# Supplementary material for: Neutralizing Antibodies in Patients with Chronic Hepatitis C, Genotype 1, against a Panel of Genotype 1 Culture Viruses: Lack of Correlation to Treatment Outcome
Source: PubMed Central journal article supplement (PMC3646876; doi:10.1371/journal.pone.0062674), 2013-05-07

Figure S1

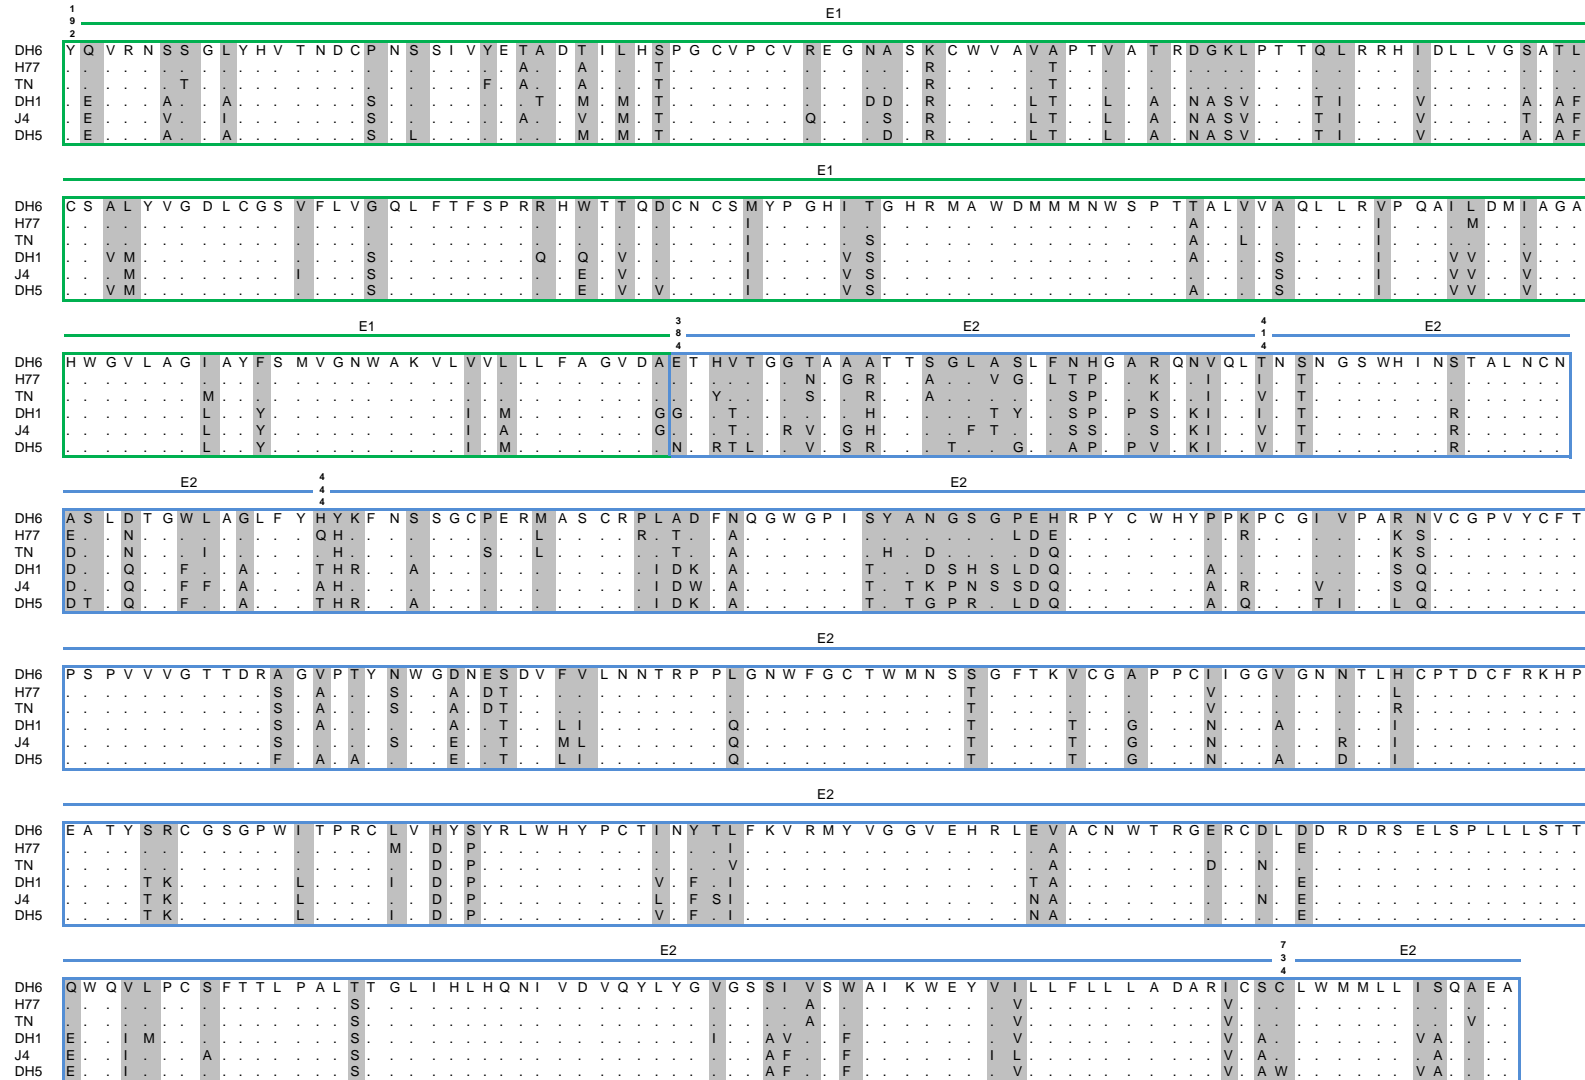

Supplement: pone.0062674.s001.pdf [file pone.0062674.s001.pdf]
